# Supplementary material
Source: Elsevier journal article supplement (https://www.sciencedirect.com/science/article/pii/S0021755720302023)
Supplement: mmc1 [file S0021755720302023:mmc1.docx]

**Figure S1 - Flowchart of sample selection. Study of Cardiovascular Risks in Adolescents (ERICA), Brazil, 2013-2014.**
